# Supplementary material for: Improved Bladder Tumor RNA Isolation from Archived Tissues Using Methylene Blue for Normalization, Multiplex RNA Hybridization, Sequencing and Subtyping
Source: MDPI journal article supplement (doi:10.3390/ijms231810267), 2022-09-06
Supplement: s1 [file s1]

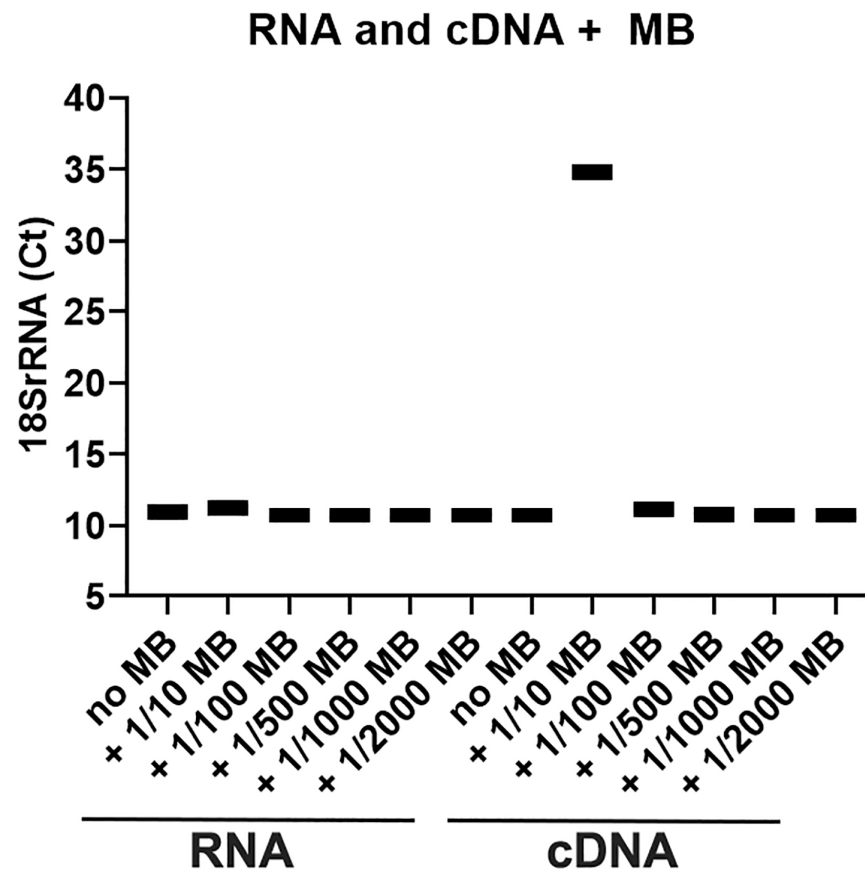

**Figure S1.** MB non-interference with RNA and cDNA using qPCR. Bar graph shows *18S rRNA* qPCR Ct values (Y-axis) from purified RNA incubated with (+) MB testing a series of dilutions (X-axis) and incubated with cDNA prior to qPCR testing a series of dilutions. RNA and cDNA (-) MB was used as a control.

## Bioanalysis of RNA using isolation methods A - E and amplification efficiencies

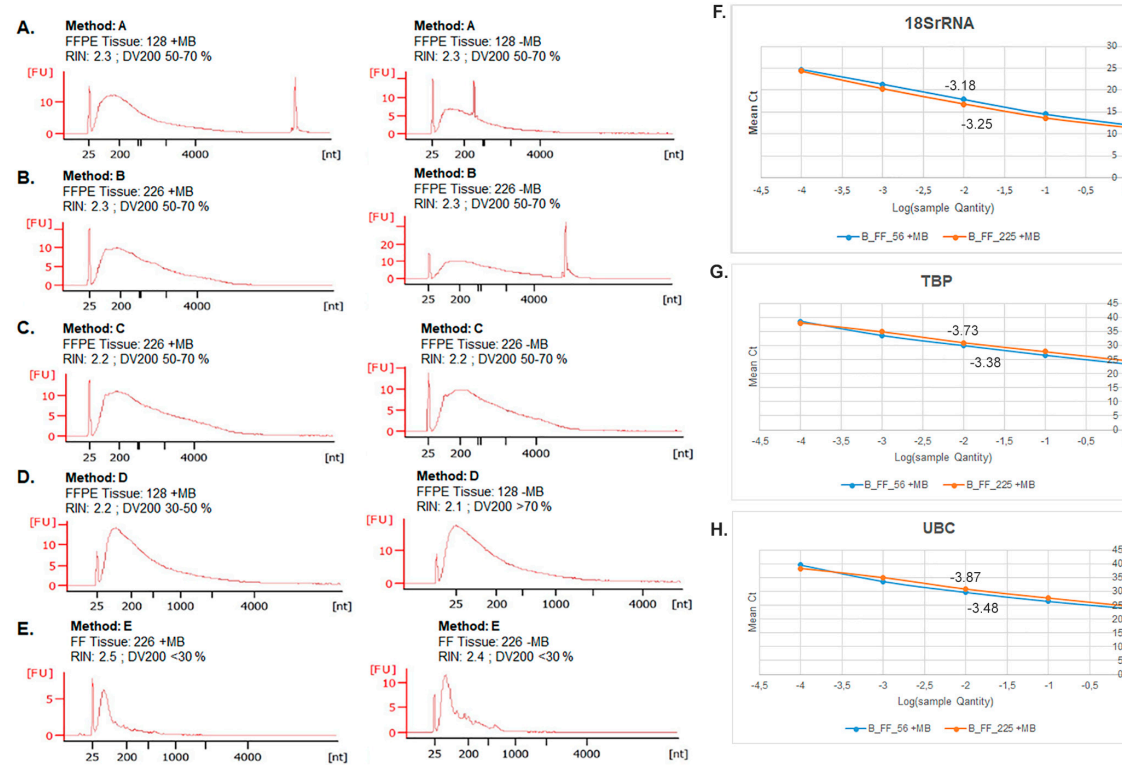

**Figure S2.** Bioanalysis of RNA from isolation methods and amplification efficiencies. A-E show chromatograms from RNA isolated from FFPE and FF tissues with Method A-E with or without MB, including the RIN and DV200 values for chosen examples; F-G: Two different MIBC RNAs were isolated using Method B with MB and were serially diluted to 1: 10.000. QPCR of *18S rRNA*, *TBP* and *UBC* was performed and standard curves created, which were used to calculate slopes (numbers above/below the curves).

**Table S1.** Top forward and bottom reverse primer for genes.

| <b>Gene name</b> | <b>TF (5'-3')</b>       | <b>BR (5'-3')</b>       |
|------------------|-------------------------|-------------------------|
| <i>5SrRNA</i>    | CCTGAACGCGCCCGATCT      | TACAGCACCCGGTATTCCCA    |
| <i>5.8SrRNA</i>  | AGCGGTGGATCACTCGGC      | CAAGTGC GTTCGAAGTGT CGA |
| <i>18SrRNA</i>   | GCAATTATTCCCATGAACG     | GGCCTCACTAAACCATCCAA    |
| <i>GUSB</i>      | ACGTGGTTGGAGAGCTCATTTG  | GTTGTCTCTGCCGAGTGAAGA   |
| <i>TBP</i>       | GAAGTTGGGTTTTCCAGCTAAGT | ACTAAATTGTTGGTGGGTGAGC  |
| <i>UBC</i>       | GAAGATGGTCGTACCCTGTCT   | GTCTTGCCAGTGAGTGTCTTC   |

Left to right columns: Gene name; top forward (TF) and bottom reverse (BR) primer nucleotide sequences for qPCR.

**Table S2.** Thirty-four reference genes and six MIBC subtyping target genes.

| <b>Gene name</b> | <b>Accession number</b> | <b>Gene Type</b> |
|------------------|-------------------------|------------------|
| <i>ACTB</i>      | NM_001101.5             | Reference gene   |
| <i>ALAS1</i>     | NM_000688.6             | Reference gene   |
| <i>ATP5F1B</i>   | NM_001686.4             | Reference gene   |
| <i>B2M</i>       | NM_004048.4             | Reference gene   |
| <i>CFL1</i>      | NM_005507.3             | Reference gene   |
| <i>CYC1</i>      | NM_001916.5             | Reference gene   |
| <i>EIF4A2</i>    | NM_001967.4             | Reference gene   |
| <i>GAPDH</i>     | NM_002046.7             | Reference gene   |
| <i>GUSB</i>      | NM_000181.4             | Reference gene   |
| <i>HMBS</i>      | NM_000190.4             | Reference gene   |
| <i>HNRNPL</i>    | NM_001533.3             | Reference gene   |
| <i>HPRT1</i>     | NM_000194.3             | Reference gene   |
| <i>HSP90AB1</i>  | NM_001371238.1          | Reference gene   |
| <i>PCBP1</i>     | NM_006196.4             | Reference gene   |

|                |                |                     |
|----------------|----------------|---------------------|
| <i>PGK1</i>    | NM_000291.4    | Reference gene      |
| <i>PPIA</i>    | NM_021130.5    | Reference gene      |
| <i>RBCK1</i>   | NM_006462.6    | Reference gene      |
| <i>RER1</i>    | NM_007033.5    | Reference gene      |
| <i>RPL13</i>   | NM_000977.4    | Reference gene      |
| <i>RPL29</i>   | NM_000992.3    | Reference gene      |
| <i>RPL37A</i>  | NM_000998.5    | Reference gene      |
| <i>RPLP0</i>   | NM_001002.4    | Reference gene      |
| <i>RPS23</i>   | NM_001025.5    | Reference gene      |
| <i>SDHA</i>    | NM_004168.4    | Reference gene      |
| <i>TBP</i>     | NM_003194.5    | Reference gene      |
| <i>TFRC</i>    | NM_003234.4    | Reference gene      |
| <i>TSFM</i>    | NM_001172696.2 | Reference gene      |
| <i>TMEM199</i> | NM_152464.3    | Reference gene      |
| <i>TUBB</i>    | NM_001293212.2 | Reference gene      |
| <i>UBB</i>     | NM_018955.4    | Reference gene      |
| <i>UBC</i>     | NM_021009.7    | Reference gene      |
| <i>UBE2D2</i>  | NM_003339.3    | Reference gene      |
| <i>WDR55</i>   | NM_017706.5    | Reference gene      |
| <i>YWHAZ</i>   | NM_145690.3    | Reference gene      |
| <i>KRT5</i>    | NM_000424.4    | Basal target gene   |
| <i>KRT14</i>   | NM_000526.5    | Basal target gene   |
| <i>CD44</i>    | NM_000610.4    | Basal target gene   |
| <i>KRT20</i>   | NM_019010.3    | Luminal target gene |
| <i>GATA3</i>   | NM_001002295.2 | Luminal target gene |
| <i>FOXA1</i>   | NM_004496.5    | Luminal target gene |

**Table S3:** Reference genes for BLCA / MIBC.

| <b>cancer</b>       | <b>cohort [n] &amp; tissues</b> | <b>controls [n] &amp; tissues</b> | <b>RNA isolation</b> | <b>Analysis method</b> | <b>reference genes tested</b> | <b>best reference genes</b>          | <b>literature reference</b> |
|---------------------|---------------------------------|-----------------------------------|----------------------|------------------------|-------------------------------|--------------------------------------|-----------------------------|
| BLCA (transitional) | 14 (FF)                         | matched                           | RNeasy Mini          | qPCR                   | 9                             | SDHA, <b>TBP</b>                     | 53                          |
| BLCA (transitional) | 35 (FF)                         | 35 (matched)                      | Trizol               | qPCR                   | 18                            | RPS23, TPT1, RPS13                   | 54                          |
| BLCA/<br>MIBC       | 28 (FFPE)                       | none                              | Roche FFPE           | qPCR                   | 20 (compared to TCGA)         | <b>UBC, RPL0, HMBS, GUSB, TBP</b>    | 55                          |
| BLCA/<br>MIBC       | 29 (FFPE)                       | 5 (bladder)                       | Promega-FFPE + MB    | RNA hybrid.            | 34                            | <b>UBC, GUSB, EIF4A2, WDR55, TBP</b> | this study                  |

Thirty-four reference genes and six MIBC subtyping target genes with NCBI Accession numbers (please see **Table S2**).
